# Supplementary material for: The shifting lipidomic landscape of blood monocytes and neutrophils during pneumonia
Source: JCI journal article supplement (doi:10.1172/jci.insight.164400), 2024-02-21
Supplement: sd1 [file 1]

## Supplemental Table 2

| ID         | Common name                               | Abbr.     | Synonyms                              | Category | Main class                         |
|------------|-------------------------------------------|-----------|---------------------------------------|----------|------------------------------------|
| BMP        | Lysobisphosphatidic acid                  | LBPA      | BMP,<br>bis(monoacylglycero)phosphate | [GP]     | Glycerophosphoglycerols [GP04]     |
| CE         | Cholesteryl ester                         | CE        |                                       | [ST]     | Sterols [ST01]                     |
| Cer        | Ceramide                                  | Cer       |                                       | [SP]     | Ceramides [SP02]                   |
| DG         | Diacylglycerol                            | DG        | DAG                                   | [GL]     | Diacylglycerols [GL02]             |
| Hex2Cer[d] | Dihexosylceramide                         | Hex2Cer   | Glc2Cer; Gal2Cer; LacCer              | [SP]     | Neutral glycosphingolipids [SP05]  |
| Hex2Cer[t] | Hydroxy-dihexosylceramide                 | Hex2Cer   |                                       | [SP]     | Neutral glycosphingolipids [SP05]  |
| HexCer[d]  | Hexosylceramide                           | HexCer    | GlcCer; GalCer                        | [SP]     | Neutral glycosphingolipids [SP05]  |
| HexCer[t]  | Hydroxy-hexosylceramide                   | HexCer    |                                       | [SP]     | Neutral glycosphingolipids [SP05]  |
| LPC        | Lysophosphatidylcholine                   | LysoPC    | LPC                                   | [GP]     | Glycerophosphocholines [GP01]      |
| LPC-O      | Alkyllysophosphatidylcholine              | LysoPC(O) |                                       | [GP]     | Glycerophosphocholines [GP01]      |
| LPC'       | Alkyl/alkenyllysophosphatidylcholine      | LysoPC(') |                                       | [GP]     | Glycerophosphocholines [GP01]      |
| LPC-P      | Alkenyllysophosphatidylcholine            | LysoPC(P) |                                       | [GP]     | Glycerophosphocholines [GP01]      |
| LPE        | Lysophosphatidylethanolamine              | LysoPE    | LPE                                   | [GP]     | Glycerophosphoethanolamines [GP02] |
| LPE-O      | Alkyllysophosphatidylethanolamine         | LysoPE(O) |                                       | [GP]     | Glycerophosphoethanolamines [GP02] |
| LPE'       | Alkyl/alkenyllysophosphatidylethanolamine | LysoPE(') |                                       | [GP]     | Glycerophosphoethanolamines [GP02] |
| LPE-P      | Alkenyllysophosphatidylethanolamine       | LysoPE(P) |                                       | [GP]     | Glycerophosphoethanolamines [GP02] |
| PA         | Phosphatidic acid                         | PA        |                                       | [GP]     | Glycerophosphates [GP10]           |
| PC         | Phosphatidylcholine                       | PC        |                                       | [GP]     | Glycerophosphocholines [GP01]      |
| PC-O       | Alkylphosphatidylcholine                  | PC(O)     |                                       | [GP]     | Glycerophosphocholines [GP01]      |
| PC'        | Alkyl/alkenylphosphatidylcholine          | PC(')     |                                       | [GP]     | Glycerophosphocholines [GP01]      |
| PC-P       | Alkenylphosphatidylcholine                | PC(P)     |                                       | [GP]     | Glycerophosphocholines [GP01]      |
| PE         | Phosphatidylethanolamine                  | PE        |                                       | [GP]     | Glycerophosphoethanolamines [GP02] |
| PE-O       | Alkylphosphatidylethanolamine             | PE(O)     |                                       | [GP]     | Glycerophosphoethanolamines [GP02] |
| PE'        | Alkyl/alkenylphosphatidylethanolamine     | PE(')     |                                       | [GP]     | Glycerophosphoethanolamines [GP02] |
| PE-P       | Alkenylphosphatidylethanolamine           | PE(P)     |                                       | [GP]     | Glycerophosphoethanolamines [GP02] |
| SM[d]      | Sphingomyelin/Ceramide phosphocholines    | SM[d]     |                                       | [SP]     | Phosphosphingolipids [SP03]        |
| SM[t]      | Hydroxysphingomyelin                      | SM[t]     |                                       | [SP]     | Phosphosphingolipids [SP03]        |
| SPH        | Sphingosine, Sphinganine                  | SPH[d]    |                                       | [SP]     | Sphingoid bases [SP01]             |
| TG         | Triacylglycerols                          | TG        | TAG                                   | [GL]     | Triacylglycerols [GL03]            |
| TG-O       | Alkyldiacylglycerol                       | TG-O      |                                       | [GL]     | Triacylglycerols [GL03]            |

**Supplemental Table 2:** Nomenclature overview of lipid classes.

### A Relative lipidomic changes in monocytes CAP admission versus controls

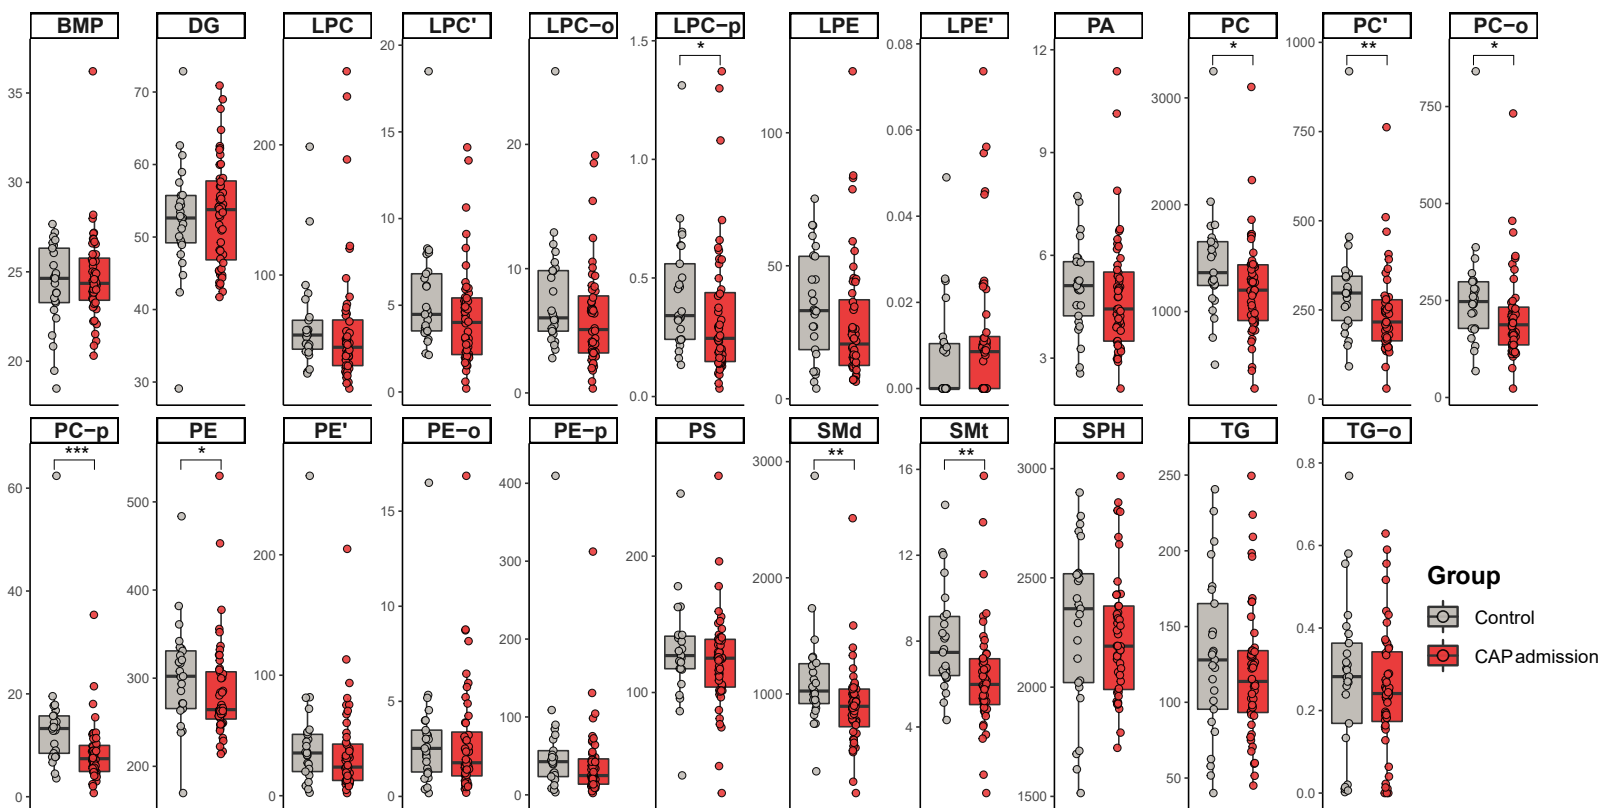

### B Relative lipidomic changes in monocytes CAP recovery versus controls

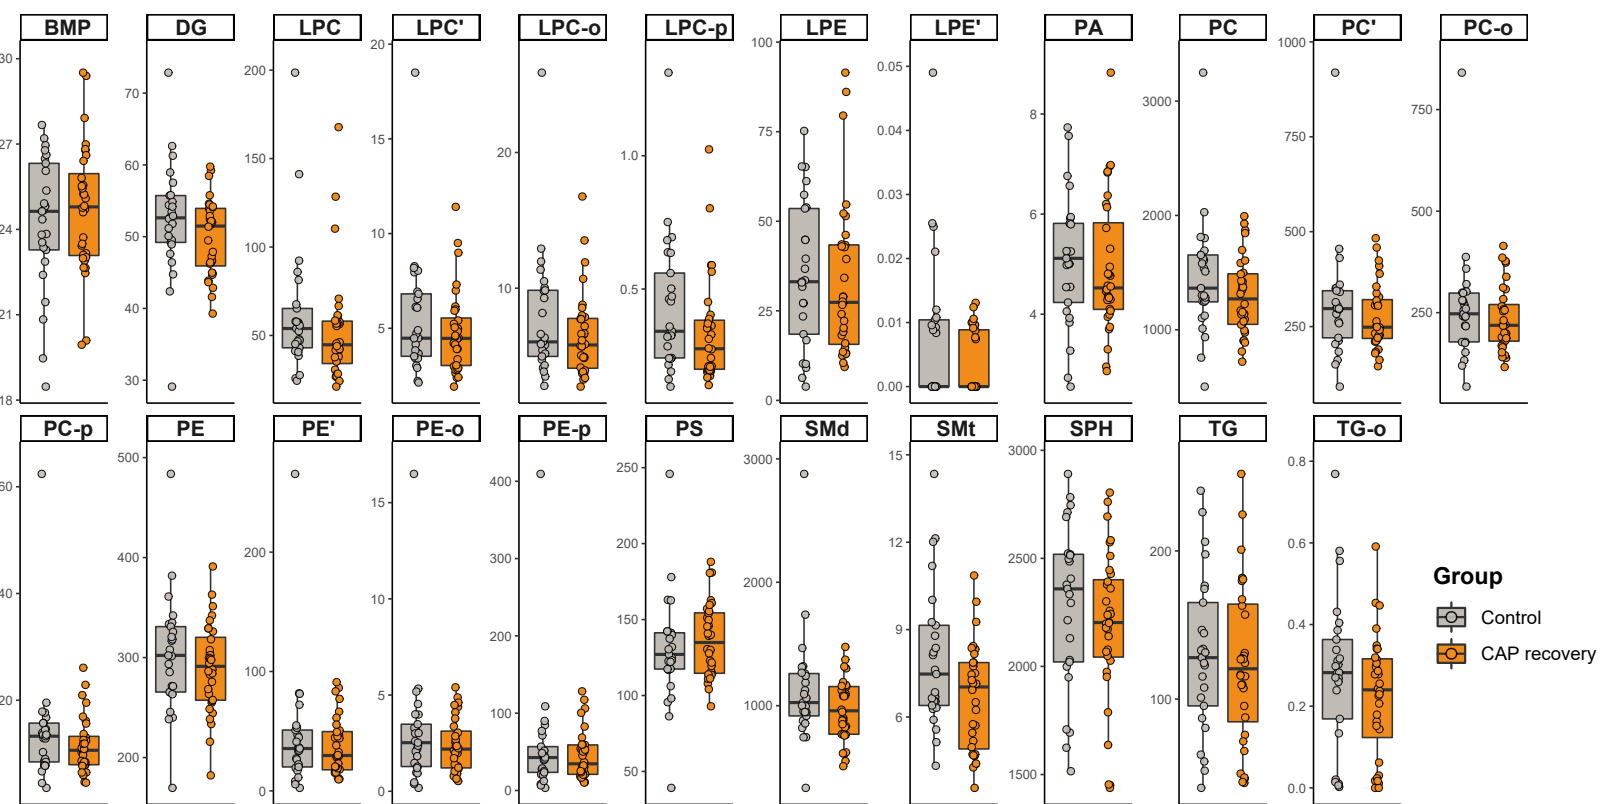

Figure S1: Relative class-wide lipidomic changes in monocytes during CAP

A) Boxplots showing class-wide lipidomic differences in monocytes between patients with CAP (N=48) and controls (N=25), as determined by a Wilcoxon-ranked sum test of aggregated values per class (a sum of all lipids per class per subject). \* p-value < 0.05, \*\* p-value < 0.01, \*\*\* p-value < 0.001, \*\*\*\* p-value < 0.0001. B) Boxplots showing classwide lipidomic differences in monocytes between patients with CAP recovery (N=33) and controls, as determined by a Wilcoxon ranked sum test of aggregated values per class (a sum of all lipids per class per subject). \* p-value < 0.05, \*\* p-value < 0.01, \*\*\* p-value < 0.001, \*\*\*\* p-value < 0.0001.

## A Relative lipidomic changes in neutrophils CAP admission versus controls

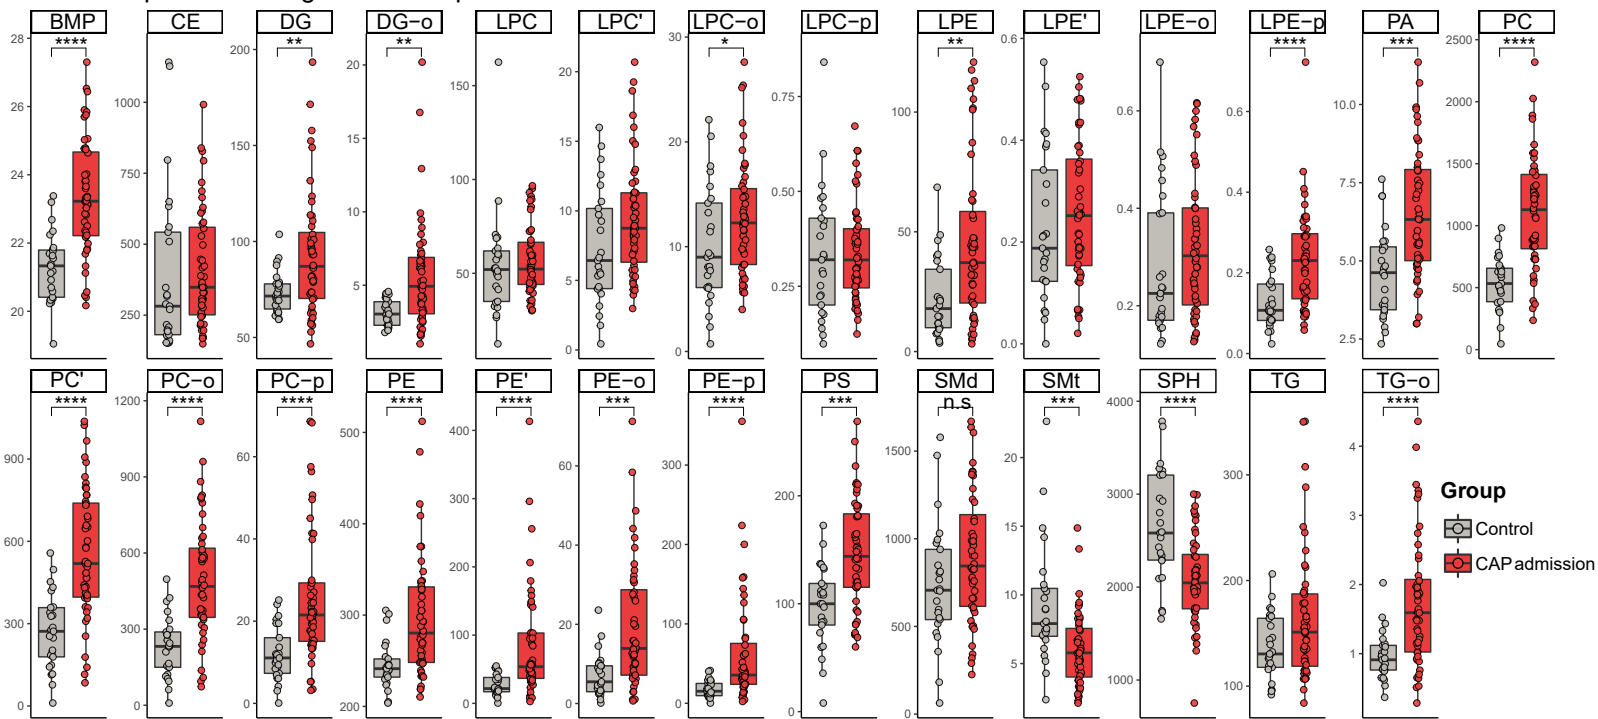

## B

### Relative lipidomic changes in neutrophils CAP recovery versus controls

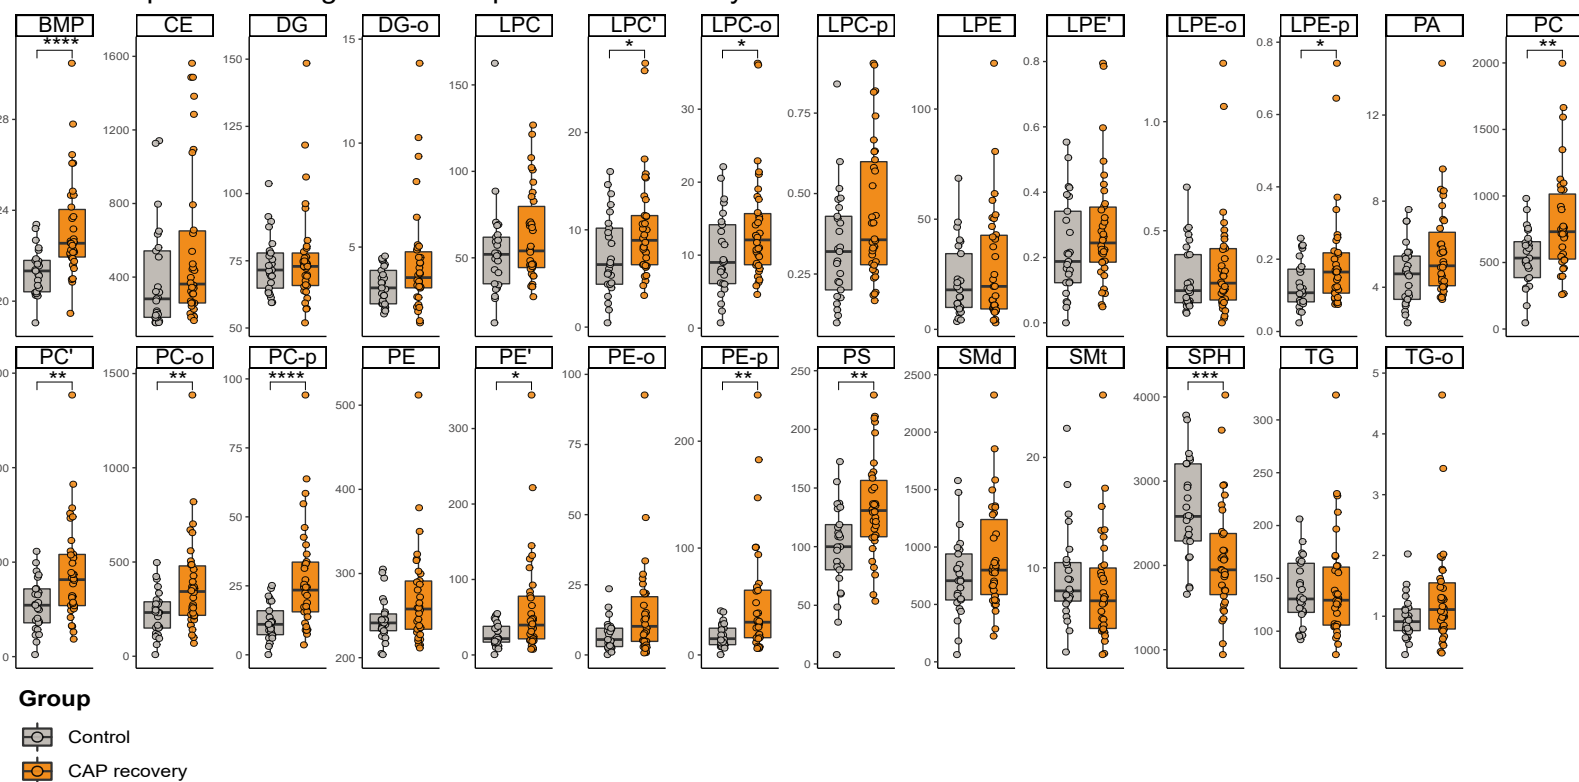

Figure S2: Relative class-wide lipidomic changes in neutrophils during CAP

A) Boxplots showing class-wide lipidomic differences in neutrophils between patients with CAP (N=48) and controls (N=25), as determined by a Wilcoxon-ranked sum test of aggregated values per class (a sum of all lipids per class per subject). \* p-value < 0.05, \*\* p-value < 0.01, \*\*\* p-value < 0.001, \*\*\*\* p-value < 0.0001. B) Boxplots showing classwide lipidomic differences in neutrophils between patients with CAP recovery (N=33) and controls, as determined by a Wilcoxon ranked sum test of aggregated values per class (a sum of all lipids per class per subject). \* p-value < 0.05, \*\* p-value < 0.01, \*\*\* p-value < 0.001, \*\*\*\* p-value < 0.0001.

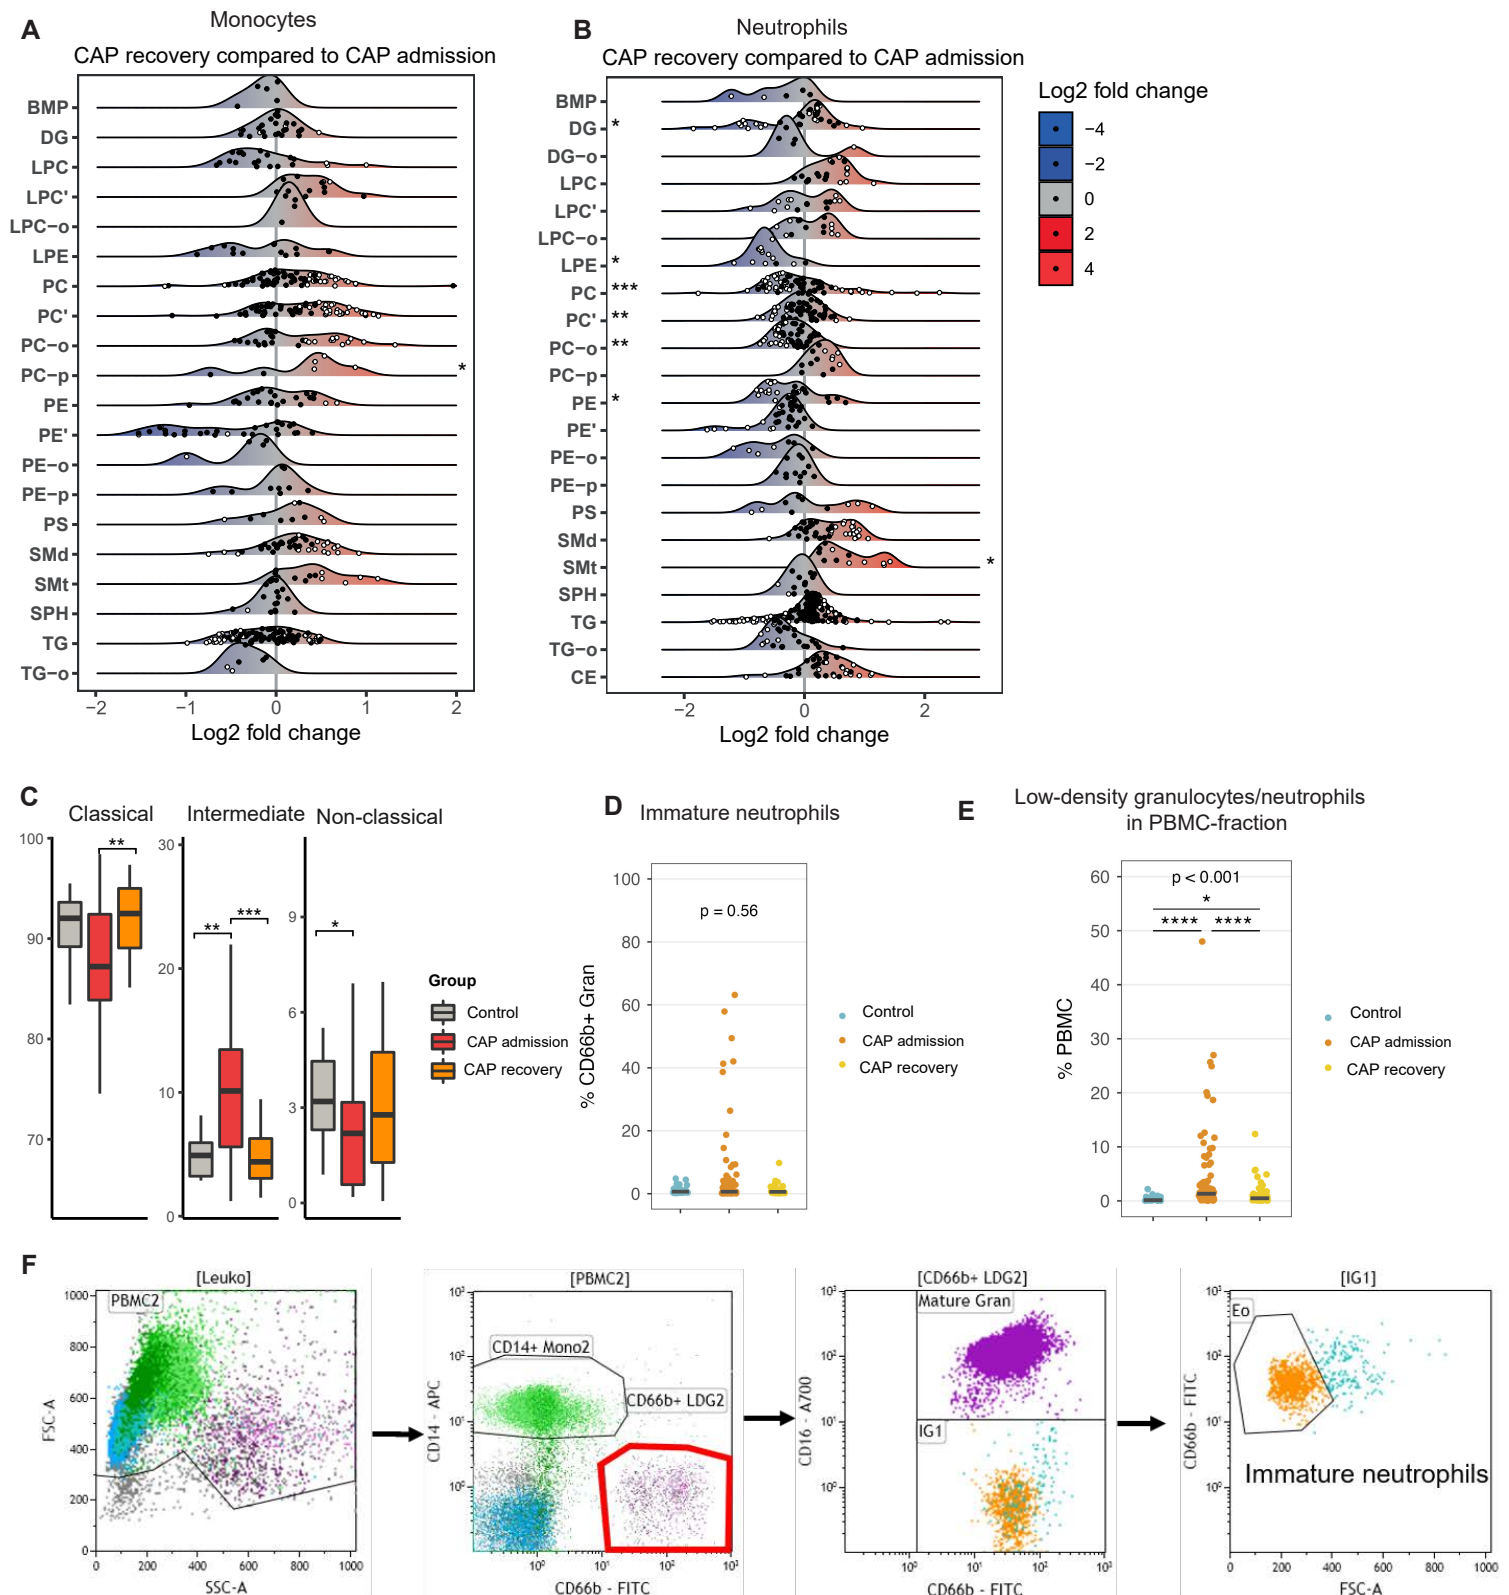

Figure S3: CAP recovery lipid landscapes and monocyte/neutrophils subsets analysis between groups

A) Monocyte lipid landscape plot, comparing CAP recovery samples to CAP admission samples in a paired analysis. Each dot represent a lipid species, which are grouped per lipid class. The color of the dots indicates whether the lipid was significantly different (white) between the groups after Benjamini-Hochberg correction for all annotated lipids. The X-axis shows the log2 fold change between groups for each lipid. The Y-axis indicates the different lipid classes, with a ridge plot per lipid class that shows the distribution of the lipids within their respective classes. On the edges of the plot, stars denote class-wide significant differences as determined by a paired Wilcoxon-ranked sum test of aggregated values per class (a sum of all lipids per class per subject). Stars on the left of the plot indicate a significant class-wide decrease, stars on the right of the plot indicate a significant class-wide increase. A p-value below 0.05 was considered significant. B) Identical to panel A, but here for neutrophils. C) Boxplot comparing the proportion of classical (CD14<sup>+</sup>CD16<sup>-</sup>), intermediate (CD14<sup>+</sup>CD16<sup>+</sup>), and non-classical (CD14<sup>dim</sup>CD16<sup>+</sup>) monocyte subsets between groups. D) Plot comparing the proportion of immature neutrophils within the neutrophil fraction between the groups. E) Plot comparing the proportion of low-density neutrophils within the polymorphonuclear cell (PBMC) fraction between groups. F) Gating strategy to identify immature low-density neutrophils within the PBMC fraction, defined as CD14<sup>+</sup> CD66b<sup>+</sup>, CD16<sup>low/-</sup> cells. \* p-value < 0.05, \*\* p-value < 0.01, \*\*\* p-value < 0.001, \*\*\*\* p-value < 0.0001.

## Neutrophils

**A**

TG saturation CAP recovery compared to CAP admission

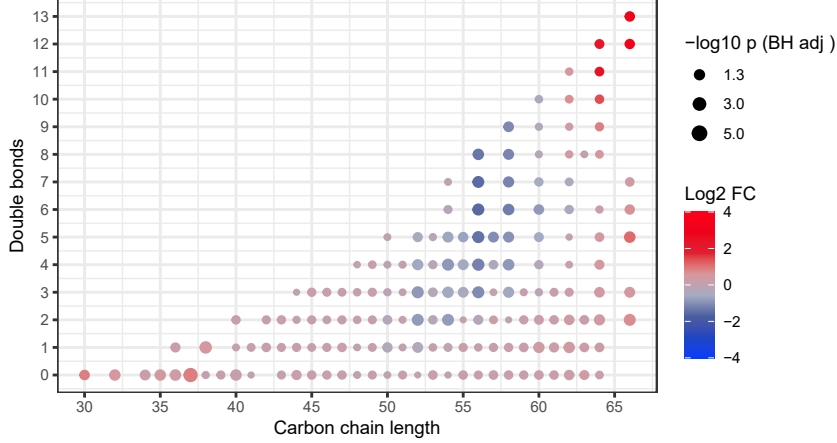**B**

DG saturation CAP admission compared to controls

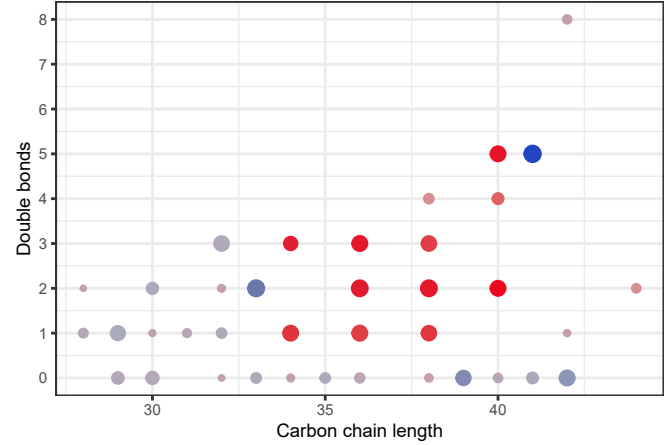

### Figure S4. Saturation in neutrophil triacylglycerol and diacylglycerol

A) Dot plots of triacylglycerol saturation differences between neutrophils of CAP recovery and controls. Each dot is a triacylglycerol species. The color of the dots indicates the  $\log_2$  fold change between the groups, the size of the dot is proportional to the Benjamini-Hochberg adjusted  $-\log_{10} p$ -value of this change. The X-axis indicates the carbon chain length, the Y-axis shows the amount of double bonds. B) Identical to panel A, but here comparing diacylglycerol saturation between CAP admission and controls.

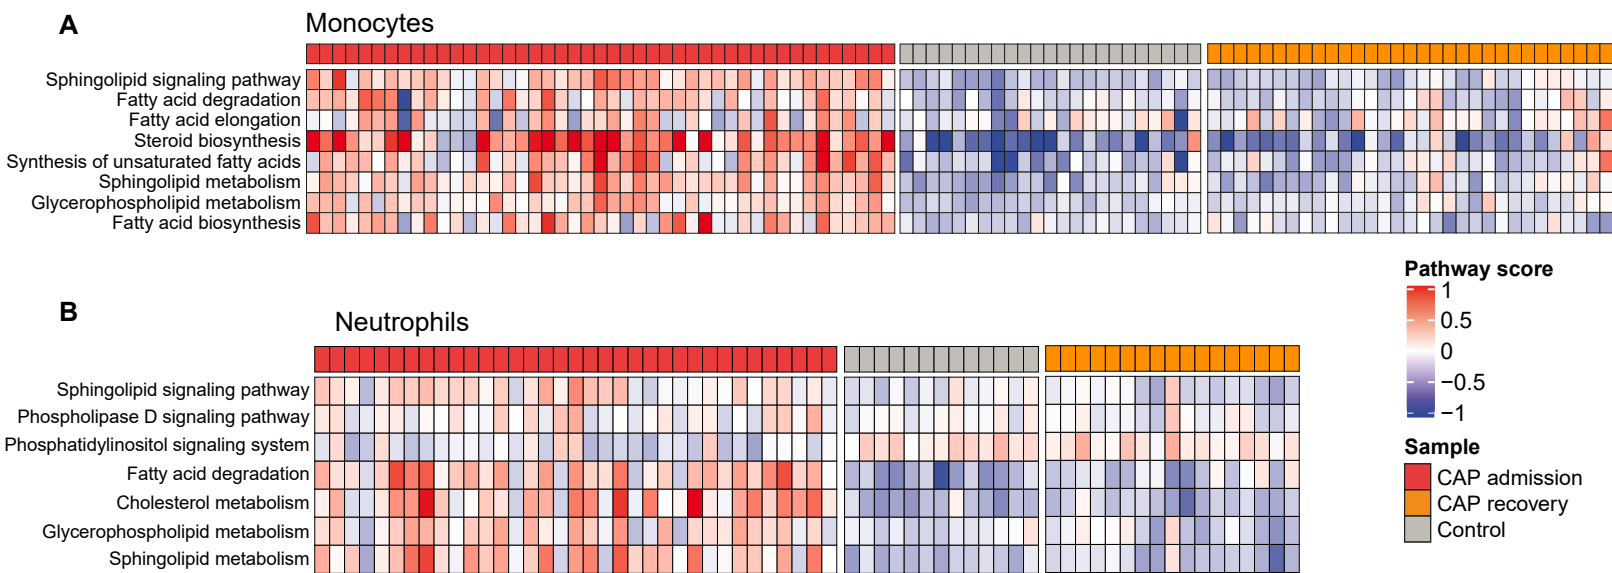

**Figure S5: Mean pathway score of enriched lipid-related pathways per subject**

A) Heatmap depicting the average Z-score of all genes within each enriched pathway in monocytes, per subject. The heatmap is split per group: CAP admission, CAP recovery and control samples. B) Heatmap depicting the average Z-score of all genes within each enriched pathway in neutrophils, per subject. The heatmap is split per group: CAP admission, CAP recovery and control samples.

**A**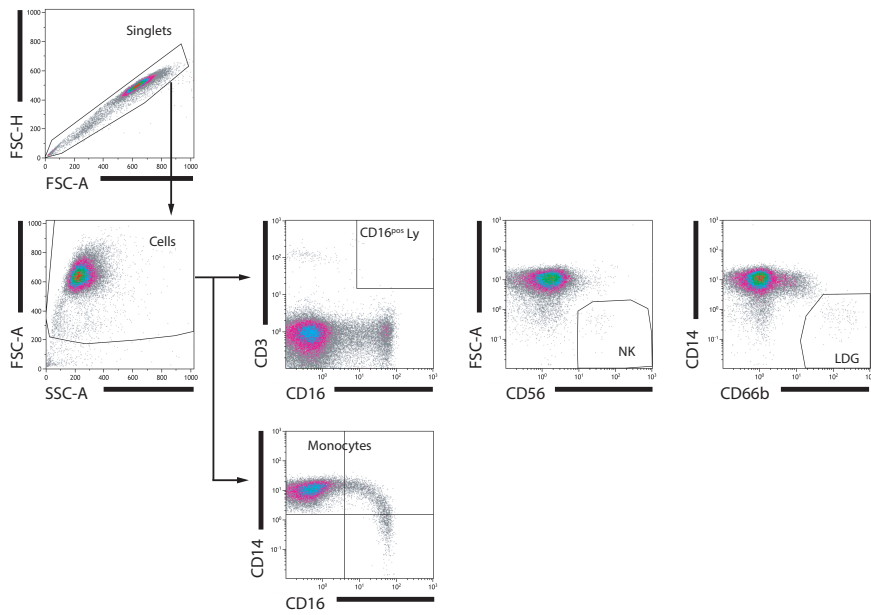**B**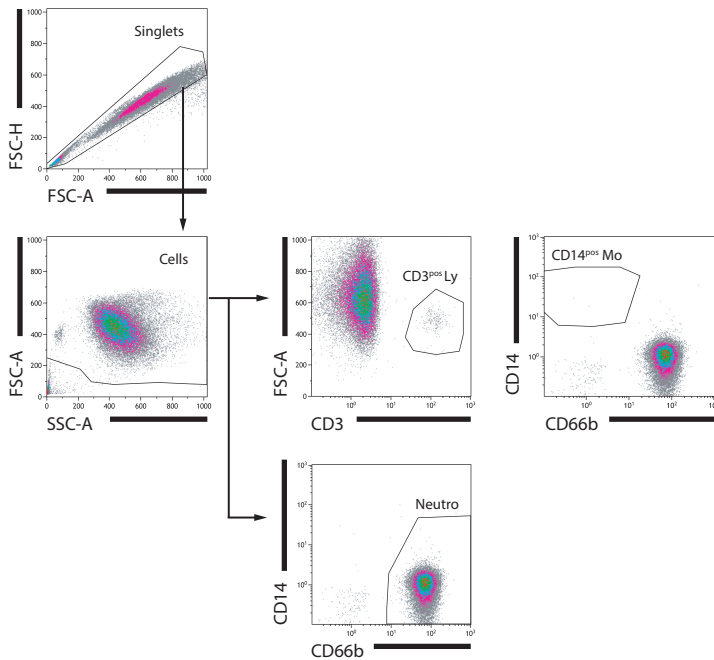

### Figure S6: Gating strategy

A) Gating strategy for monocytes: all cells in the CD14/CD16 plot were identified as monocytes, consisting of classical (CD14<sup>+</sup>CD16<sup>-</sup>), intermediate (CD14<sup>+</sup>CD16<sup>+</sup>), and non-classical (CD14<sup>dim</sup>CD16<sup>+</sup>) monocyte subsets. B) Gating strategy for neutrophils.
